# Supplementary material for: Metal-vapor deposition modulation on polymer surfaces prepared by the coffee-ring effect
Source: Royal Society of Chemistry journal article supplement (doi:10.1039/c3sm00113j), 2013-01-01
Supplement: c3sm00113j.pdf [file c3sm00113j.pdf]

## Supporting Information

### **Metal-vapor deposition modulation on polymer surfaces prepared by the coffee-ring effect**

Tsuyoshi Tsujioka, Osaka Kyoiku University,

4-698-1, Asahigaoka, Kashiwara, Osaka 582-8582, Japan,

Phone/Fax: +81-72-978-3633,

Email: tsujioka@cc.osaka-kyoiku.ac.jp

Figure S1 shows the metal deposition modulation for Pb, Zn and Mn on polystyrene (PS) coffee-ring films. The polymer coffee-ring films were prepared by an analogous process in the main text. The deposited metal thickness was regulated to 40-90 nm on a glass substrate. Metal undeposition on the ring was obtained at a different metal deposition rate ( $R_d$ ) depending on the metal species. We could not observe the metal deposition modulation for Au and Ag.

Figure S2 shows Mg deposition modulation on the coffee-ring films with various polymer species. The polymer coffee-ring films were prepared by an analogous process in the main text. The deposited Mg thickness was regulated to 110-120 nm on a glass substrate. Identical metal undeposition on the ring was obtained for poly(methyl methacrylate), poly(ethyl methacrylate), and polycarbonate.

Figure S3 shows the microscopic Raman spectroscopy characterization of the polymer coffee-ring surface before and after vacuum-storage. The peak around  $1710\text{ cm}^{-1}$  indicates  $>\text{C}=\text{O}$  of cyclohexanone and two other peaks around  $1600\text{ cm}^{-1}$  are attributed to PS. The residual cyclohexanone solvent in the film was decreased by

vacuum-storage; these results are consistent with the microscopic FT-IR ATR characterization described in the main text.

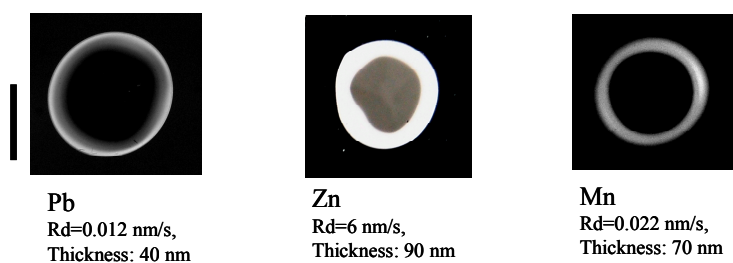

Fig. S1 Metal deposition modulation for Pb, Zn and Mn on polystyrene (PS) coffee-ring films. (Scale bar: 5 mm)

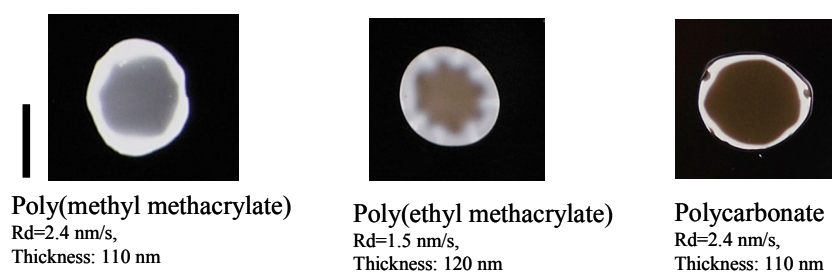

Fig. S2 Mg deposition modulation on coffee-ring films with various polymer species. (Scale bar: 5 mm)

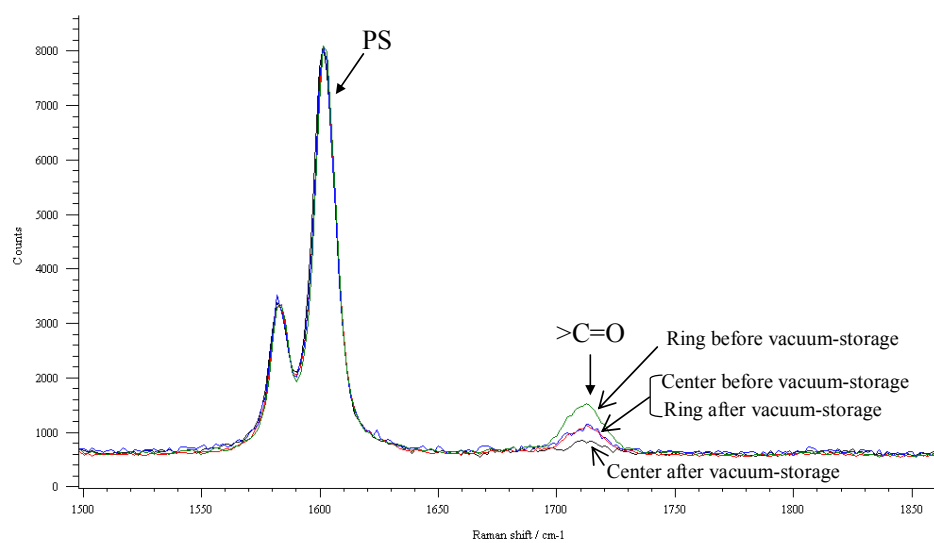

Fig. S3 Microscopic Raman spectroscopy characterization of the polymer coffee-ring surfaces before and after vacuum-storage.
